# Supplementary material for: Effect of Phosphorylation on the Collision Cross Sections of Peptide Ions in Ion Mobility Spectrometry
Source: PubMed Central journal article supplement (PMC7843839; doi:10.5702/massspectrometry.a0093), 2021-01-30
Supplement: massspectrometry-10-1-A0093_s001.pdf [file massspectrometry-10-1-A0093_s001.pdf]

## **SUPPORTING INFORMATION**

### **Effect of Phosphorylation on the Collision Cross Sections of Peptide Ions in Ion Mobility Spectrometry**

Kosuke Ogata<sup>1</sup>, Chih-Hsiang Chang<sup>1</sup> and Yasushi Ishihama<sup>1\*</sup>

1 - Department of Molecular and Cellular BioAnalysis, Graduate School of Pharmaceutical Sciences, Kyoto University, Sakyo-ku, Kyoto, Japan, 606-8501

\*Correspondence and requests for materials should be addressed to Y.I. (email: yishiham@pharm.kyoto-u.ac.jp).

#### **Table of Contents**

**Supplementary Figure S1. Visual classification of extended and compact forms of triply charged unphosphopeptides.**

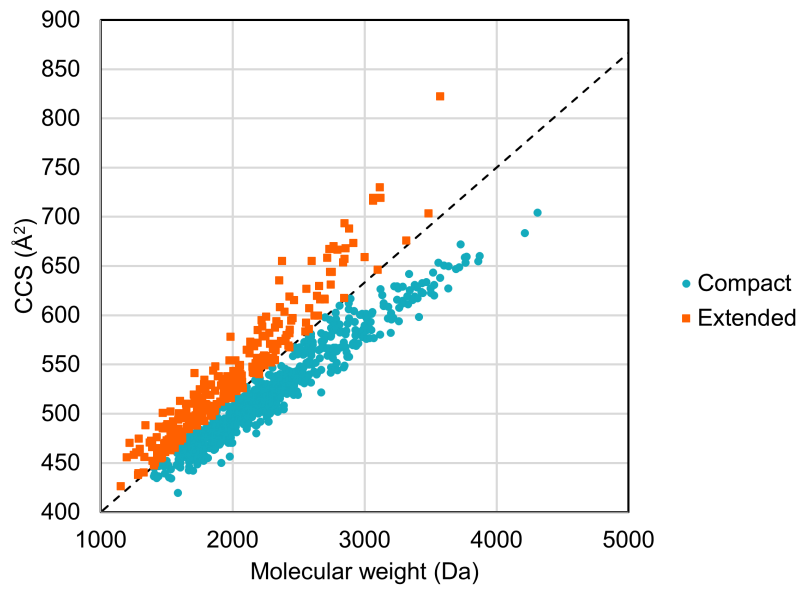

**Supplementary Figure S1.**

Visual classification of extended and compact forms of triply charged unphosphopeptides. The dashed line represents the classification boundary.
